# Supplementary material
Source: PubMed Central journal article supplement (PMC6990961)
Supplement: jamapsychiatry-77-563-s003.pdf [file jamapsychiatry-77-563-s003.pdf]

## Data Sharing Statement

Segal. Outcomes of Online Mindfulness Based Cognitive Therapy for Patients With Residual Depressive Symptoms. *JAMA Psychiatry*. Published January 29, 2020. 10.1001/jamapsychiatry.2019.4693

### Data

**Data available:** No

### Additional Information

**Explanation for why data not available:** Unidentified participant data and a data dictionary will be made available on a request only basis. We have no plans to provide our data to a publicly accessible repository at this point.
